# Supplementary material
Source: PubMed Central journal article supplement (PMC4474772)

**Figure S1**

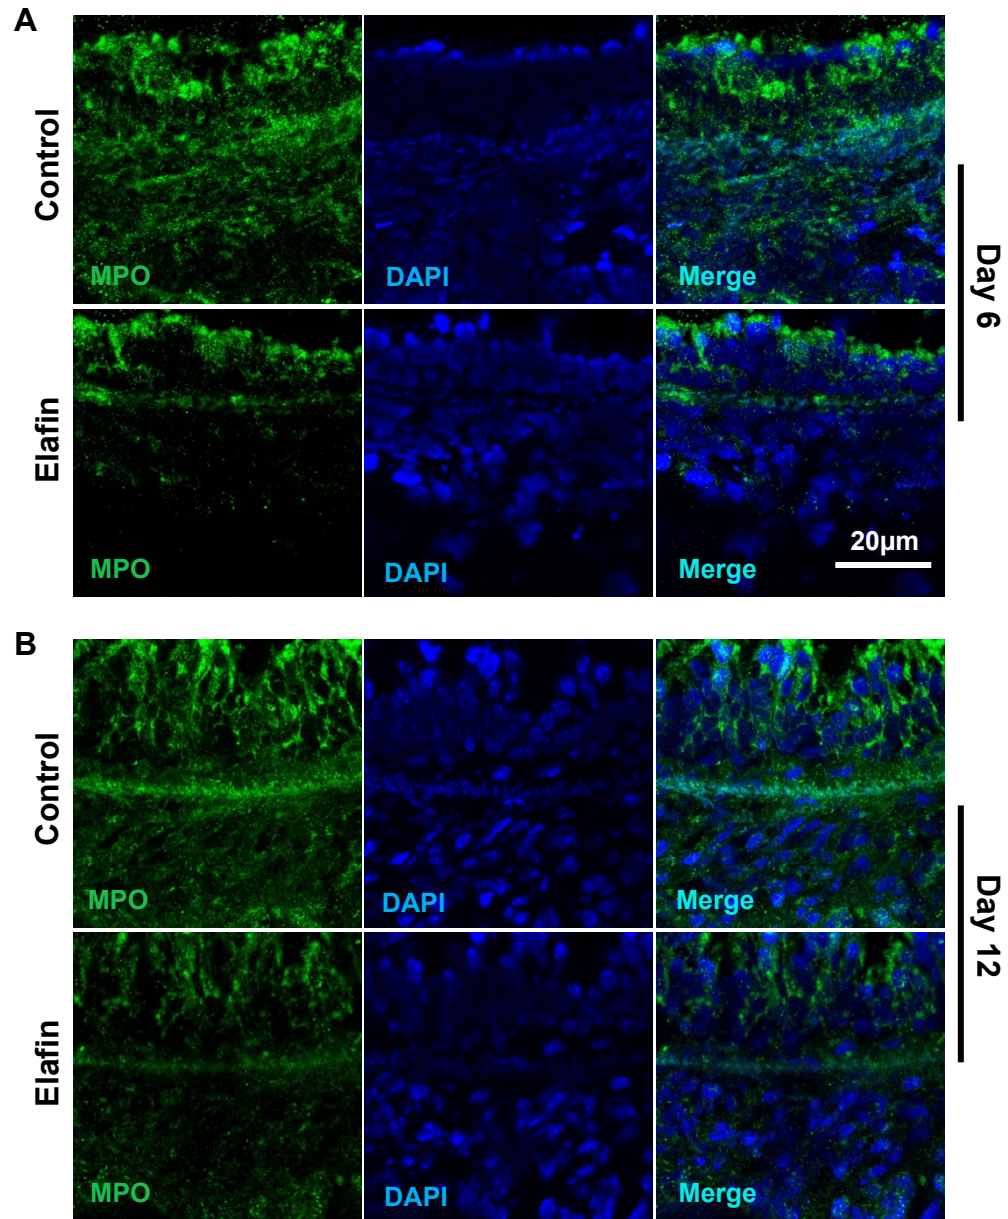

**Figure S2**

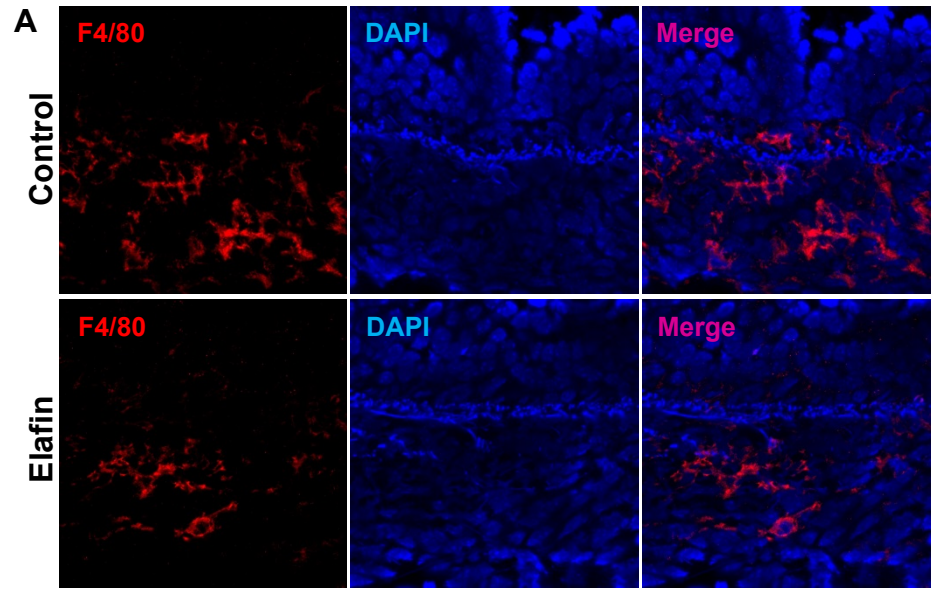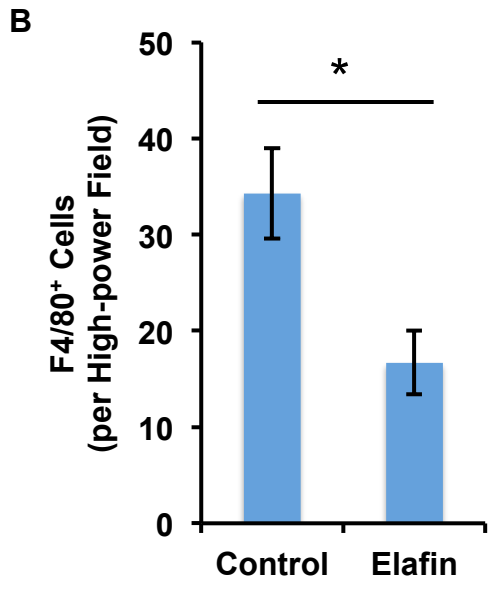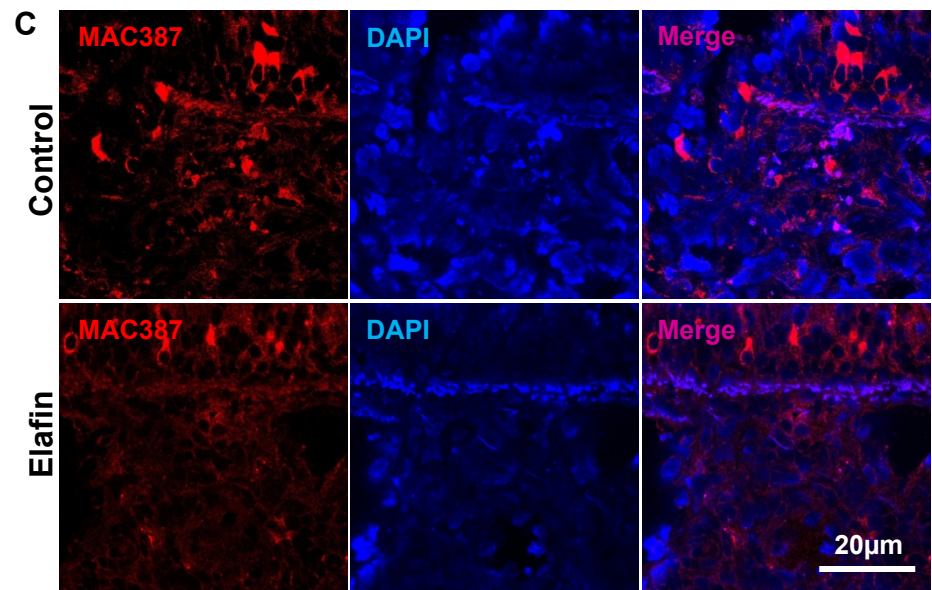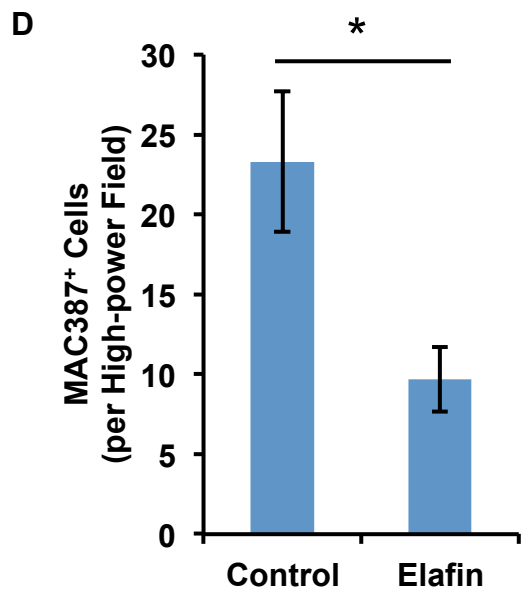

**Figure S3**

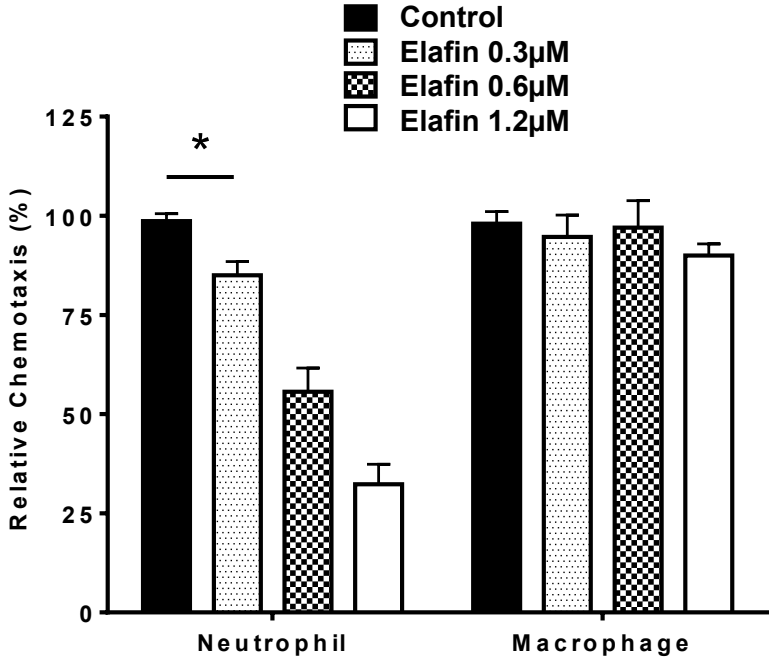



Figure S4

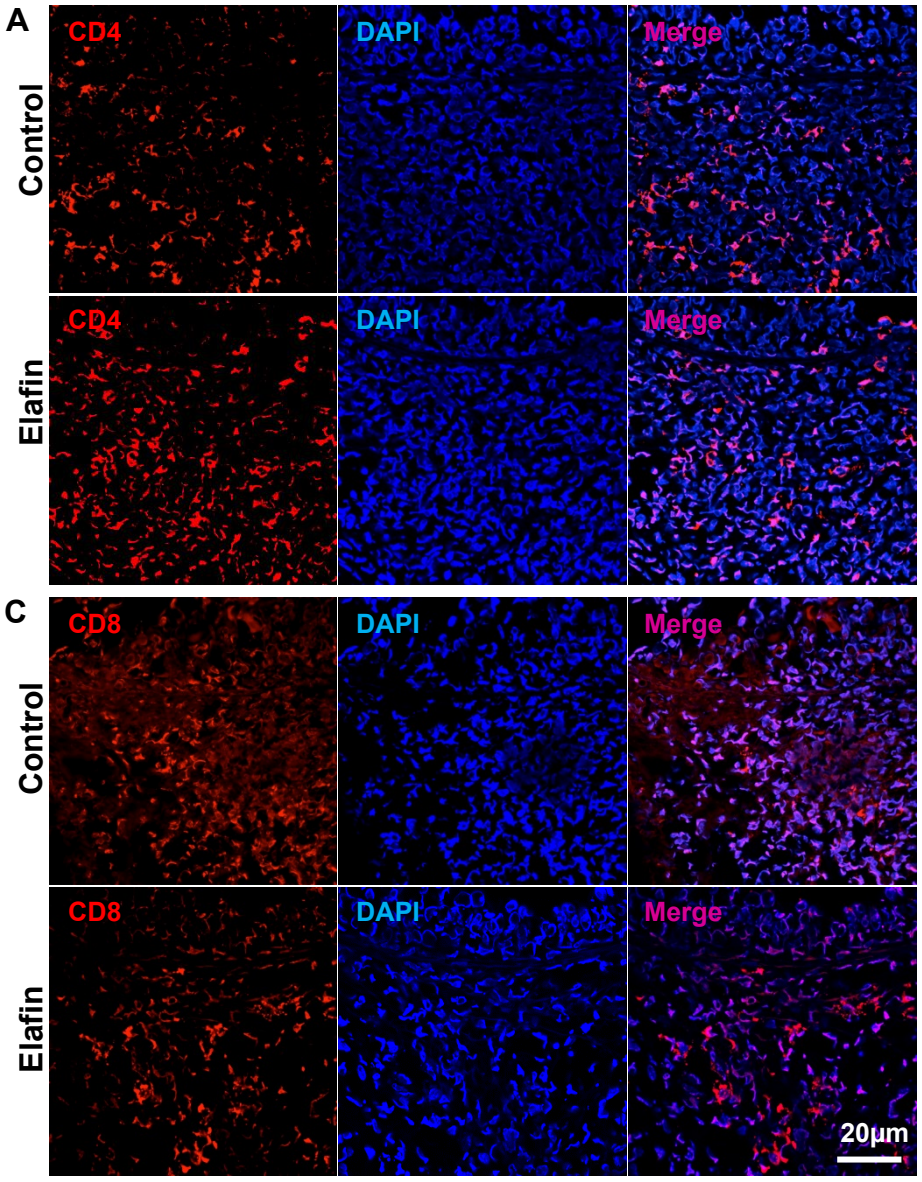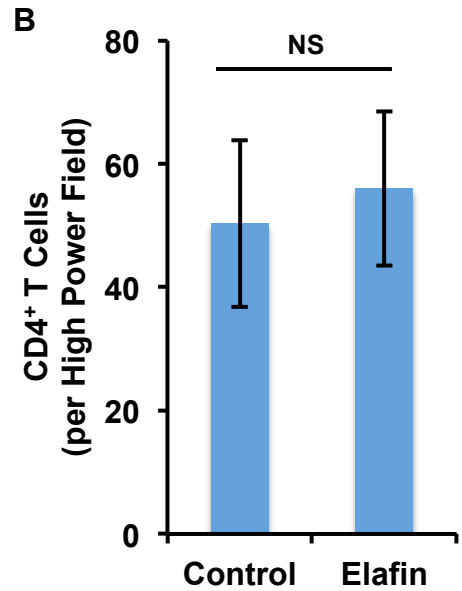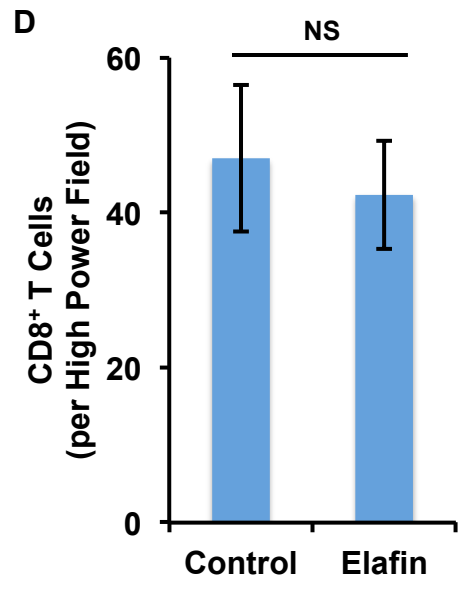

**Figure S5**

**A**

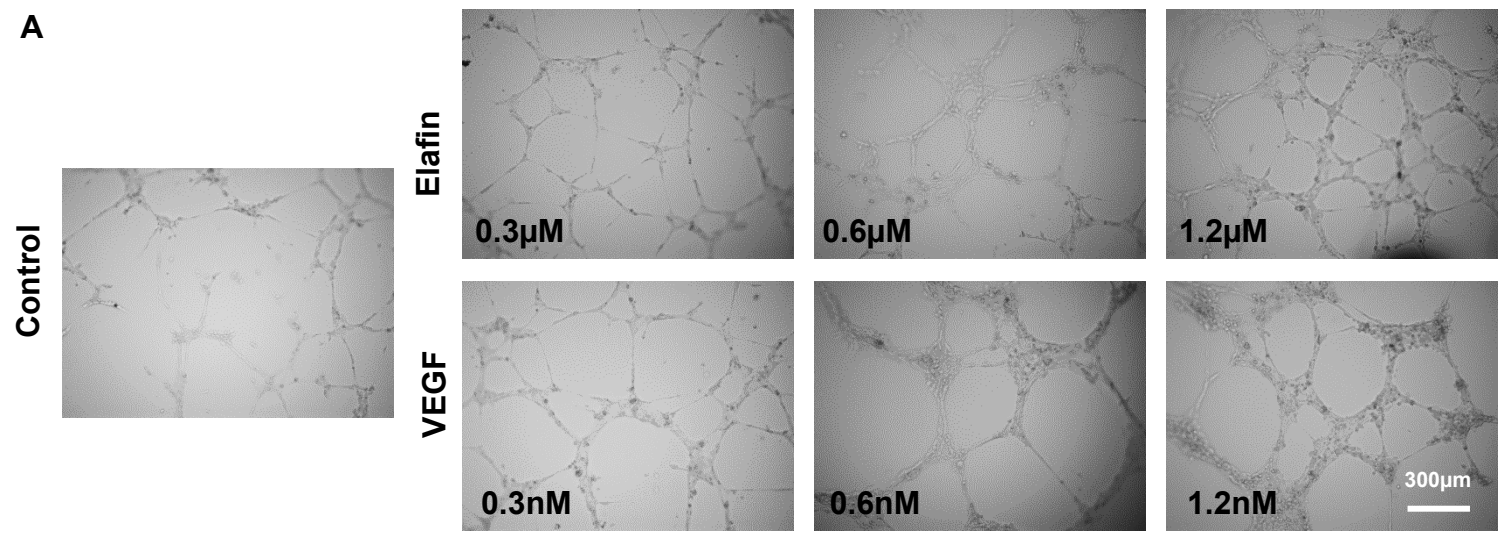

**B**

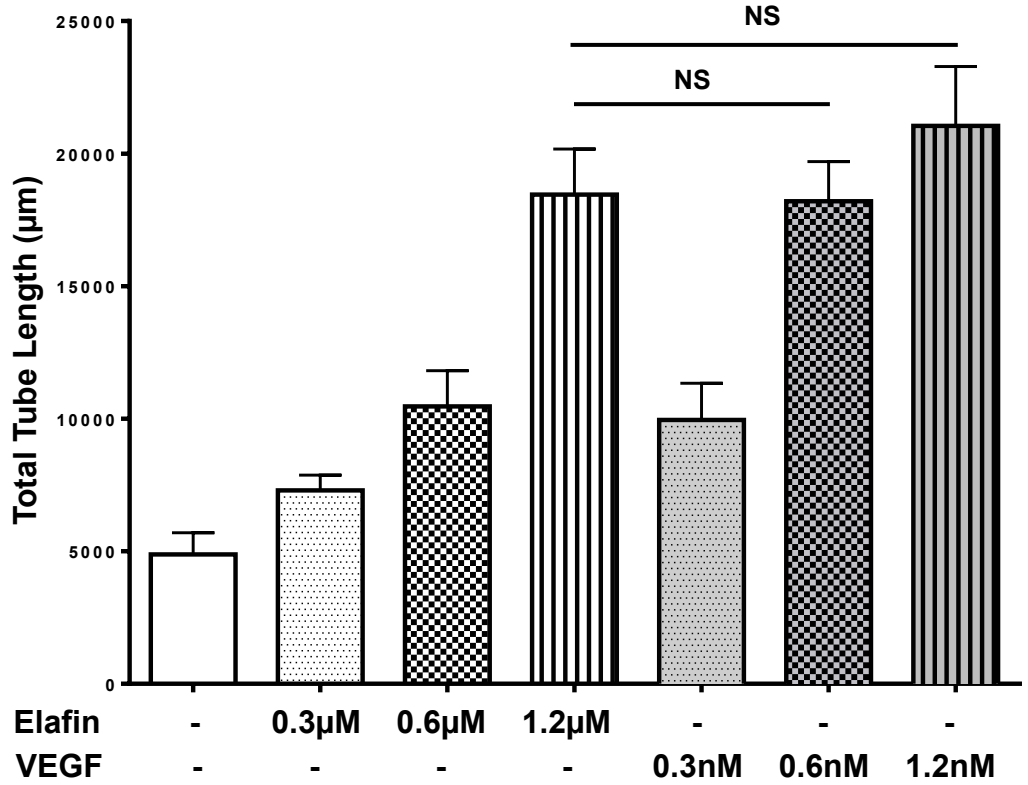

Supplement: NIHMS654620-supplement-Supp_Material.pdf [file NIHMS654620-supplement-Supp_Material.pdf]
